# Supplementary material for: Two New Terpenes Isolated from Dictyostelium Cellular Slime Molds
Source: PubMed Central journal article supplement (PMC7356884; doi:10.3390/molecules25122895), 2020-06-23

## Supplementary Materials

# Novel Two Terpenes Isolated from *Dictyostelium*

## Cellular Sime Molds

Hitomi Sasaki,<sup>1</sup> Yuzuru Kubohara,<sup>2</sup> Hirotaka Ishigaki,<sup>3</sup> Katsunori Takahashi,<sup>3</sup> Hiromi Eguchi,<sup>1</sup>

Akihiro Sugawara,<sup>1</sup> Yoshiteru Oshima<sup>1</sup> and Haruhisa Kikuchi<sup>1,\*</sup>

<sup>1</sup> Graduate School of Pharmaceutical Sciences, Tohoku University, 6-3, Aza-Aoba, Aramaki, Aoba-ku, Sendai 980-8578, Japan.

<sup>2</sup> Graduate School of Health and Sports Science, Juntendo University, 1-1 Hiraga-gakuendai, Inzai, Chiba 270-1695, Japan

<sup>3</sup> Department of Medical Technology, Faculty of Health Science, Gunma Paz College, Takasaki 370-0006, Japan

\* Correspondence: hal@mail.pharm.tohoku.ac.jp; Tel.: +81-22-795-6824

### Table of Contents

S2 ~ S4 NMR spectra of mucoroidiol (1)

S5 ~ S7 NMR spectra of firmibasiol (2)

<sup>1</sup>H NMR (600 MHz, CDCl<sub>3</sub>)

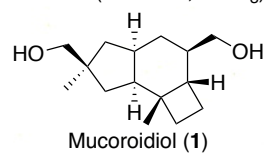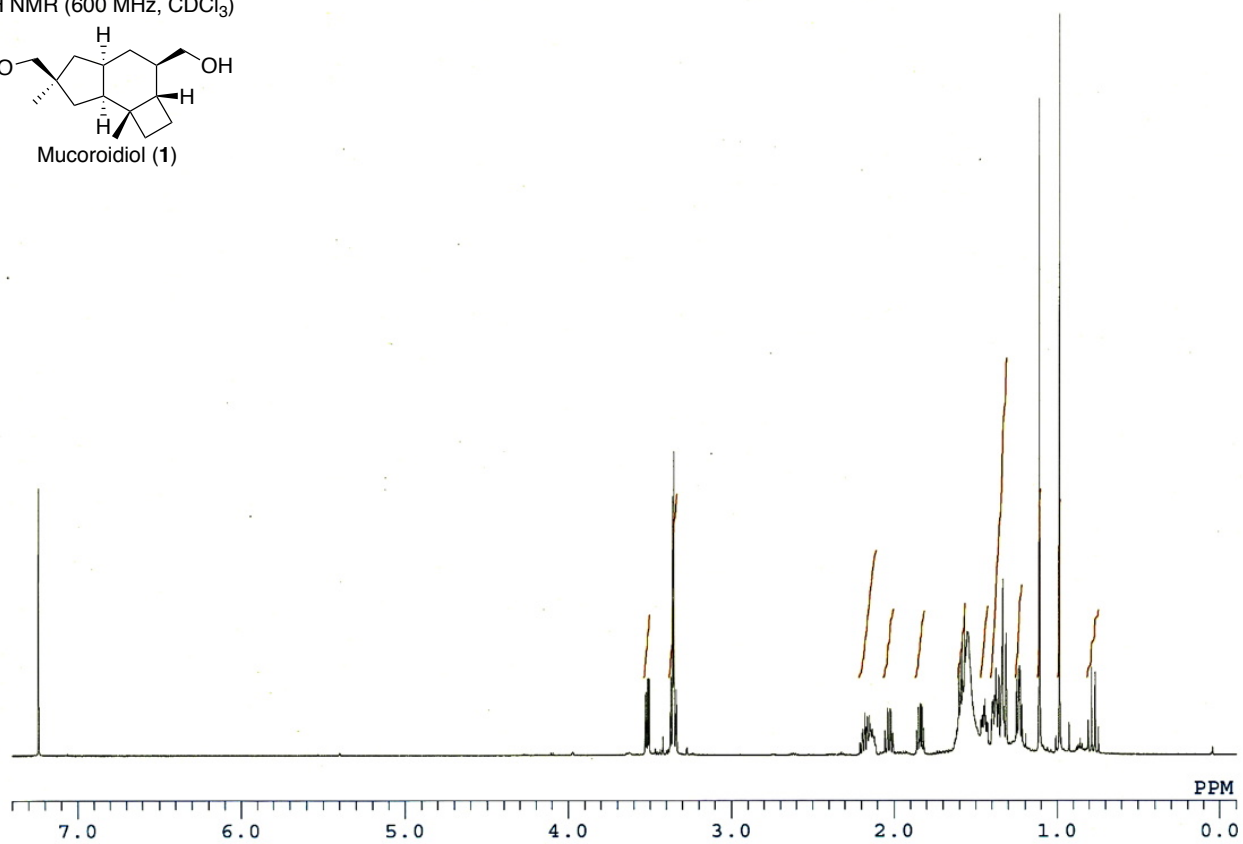

DEPT

<sup>13</sup>C NMR (150 MHz, CDCl<sub>3</sub>)

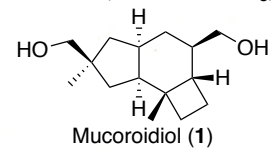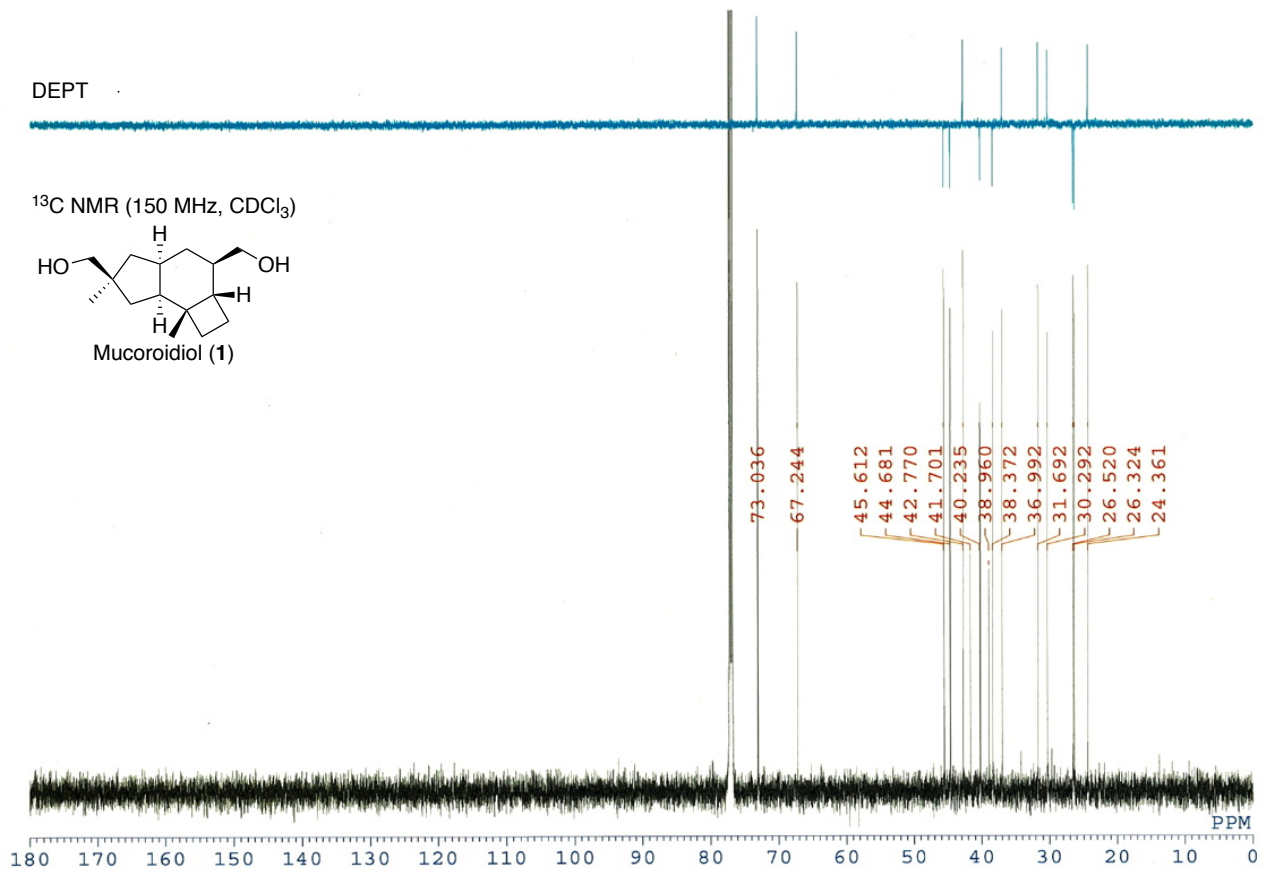

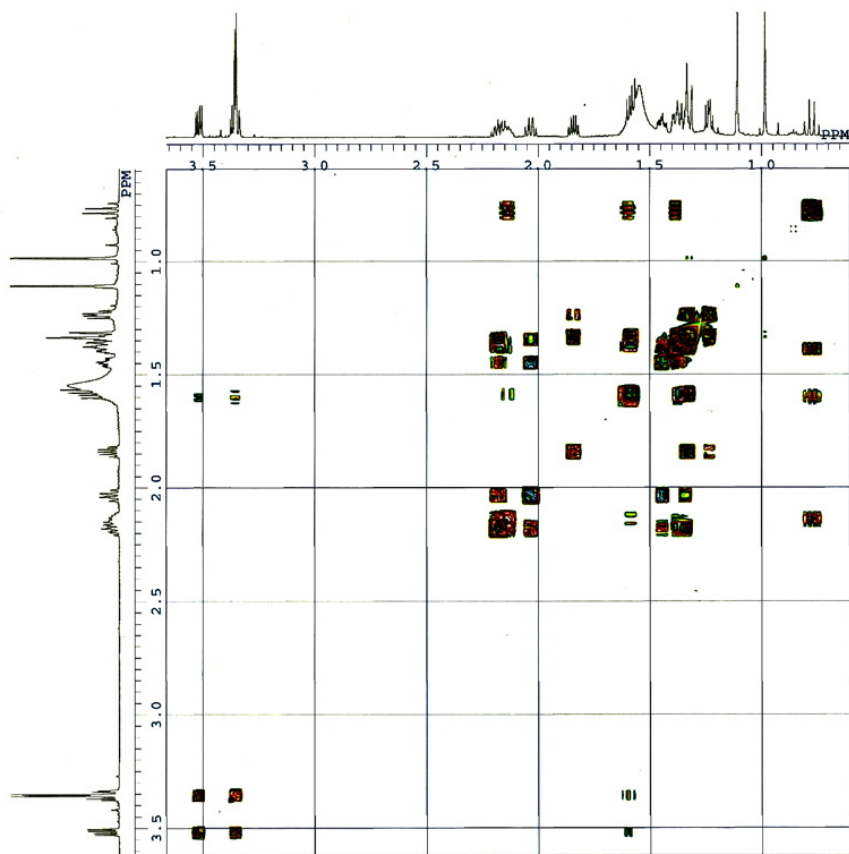

DQFCOSY

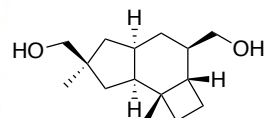

HMQC spectrum

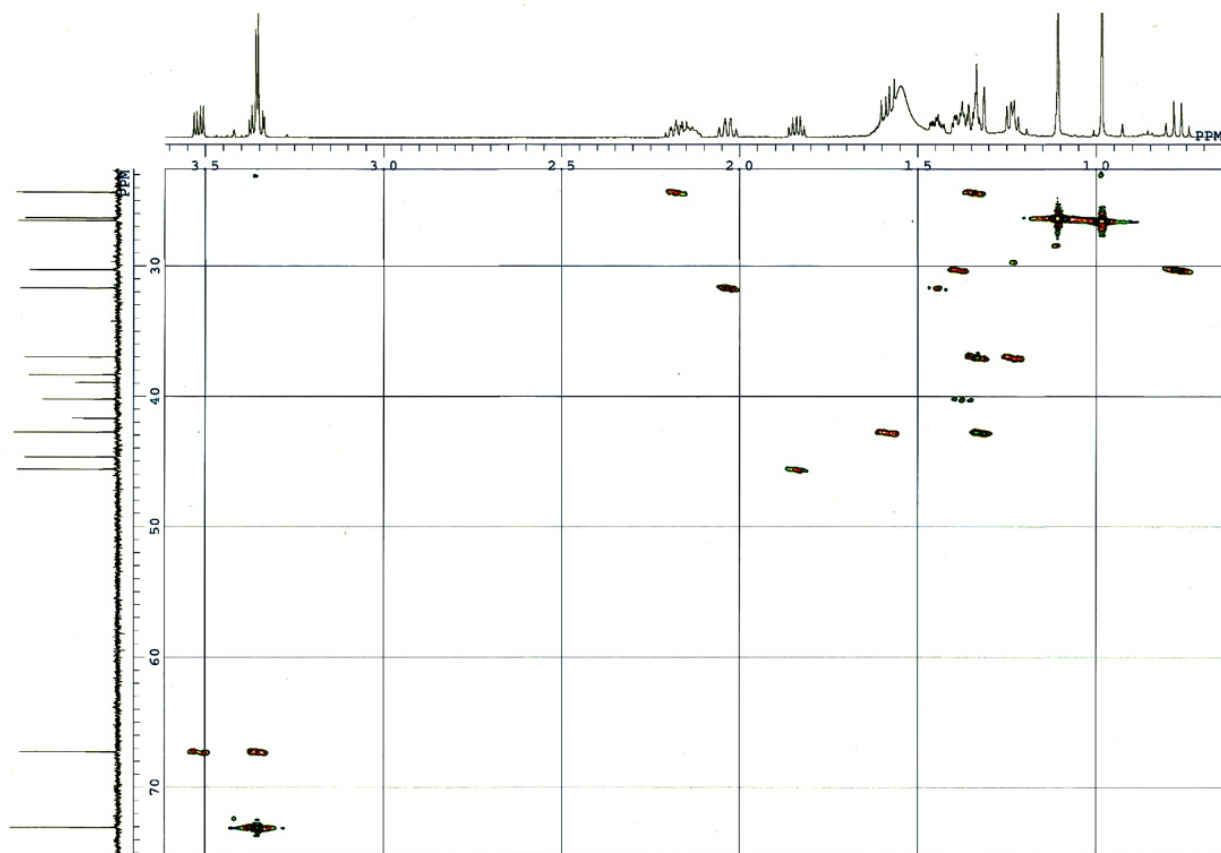

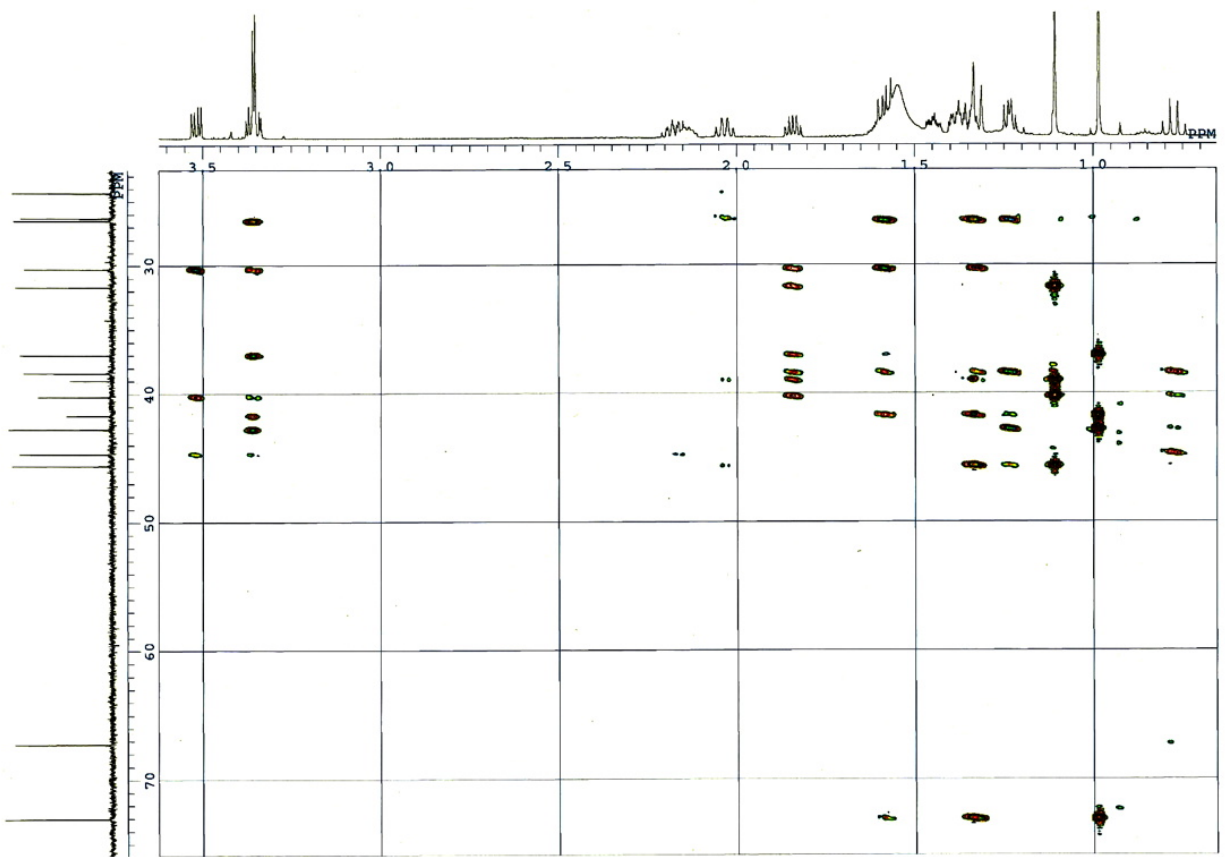

HMBC spectrum

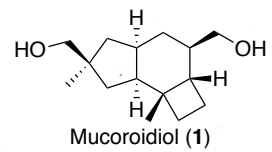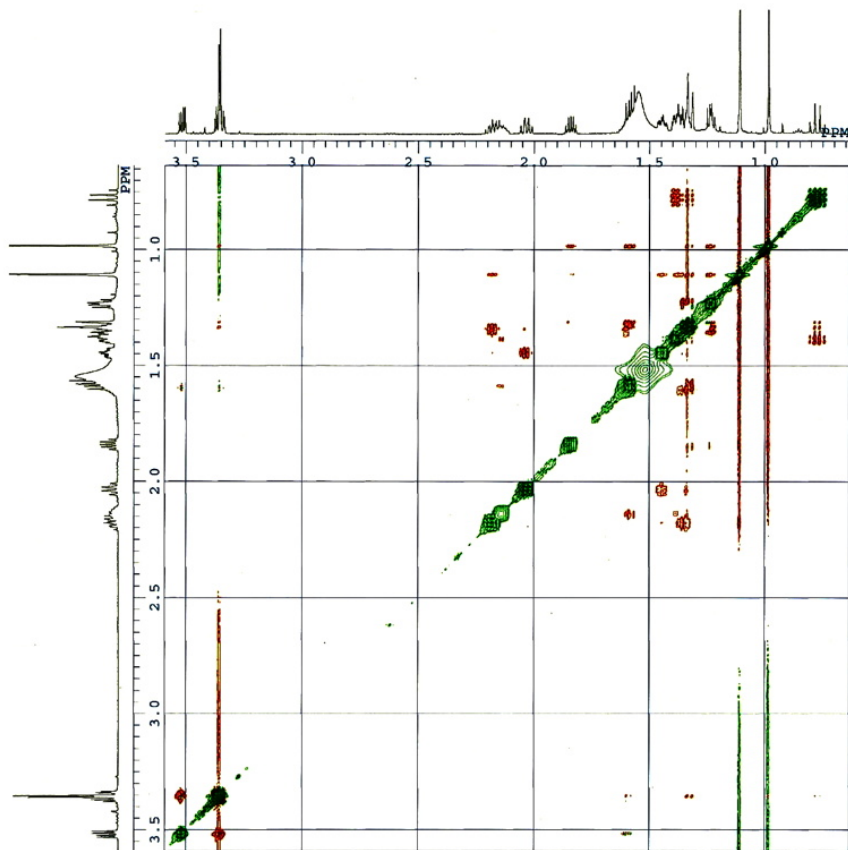

NOESY spectrum

<sup>1</sup>H NMR (600 MHz, CDCl<sub>3</sub>)

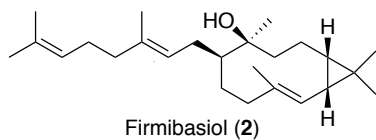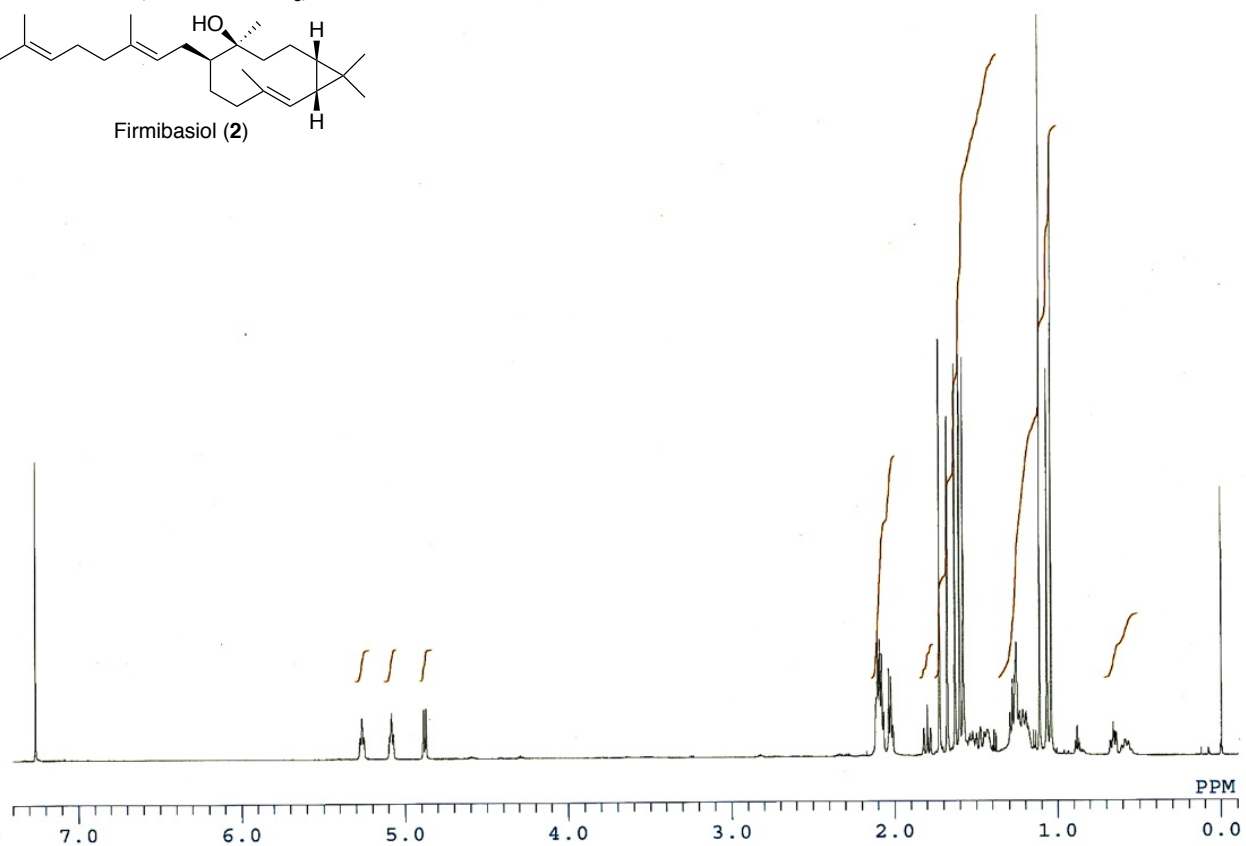

DEPT

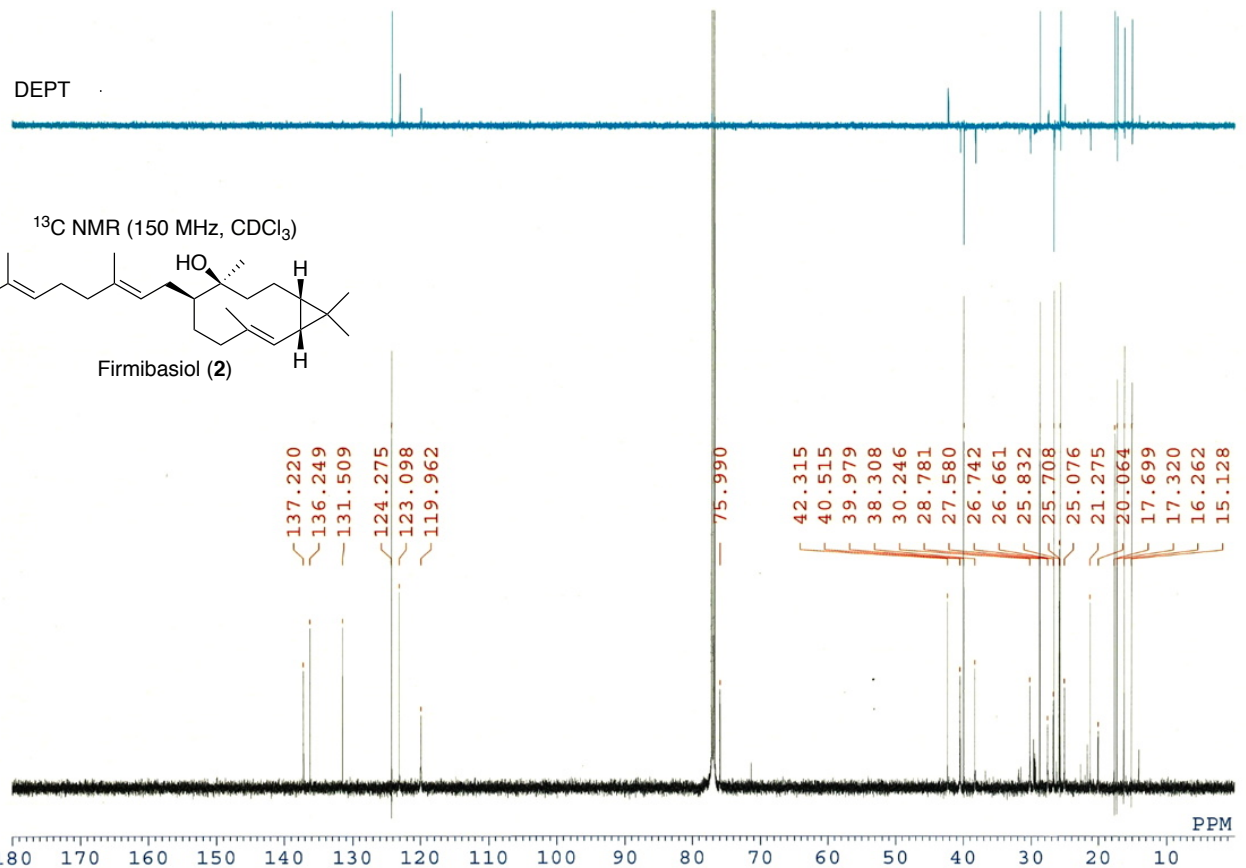

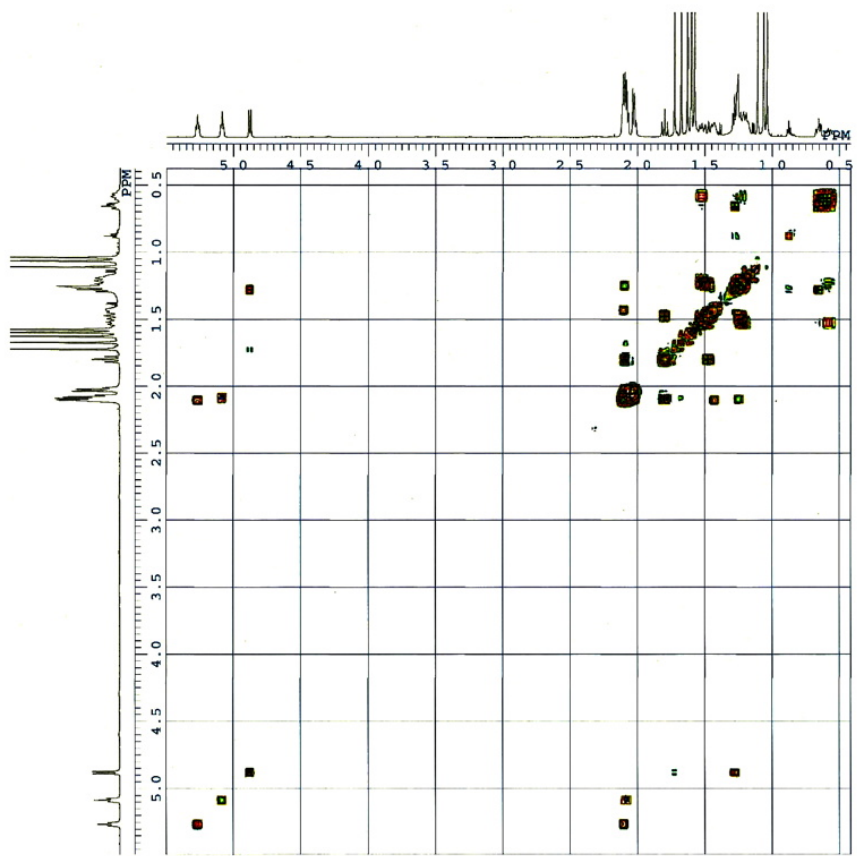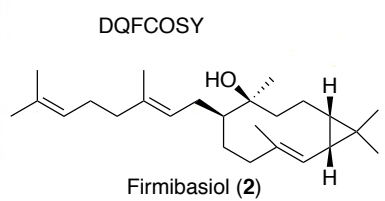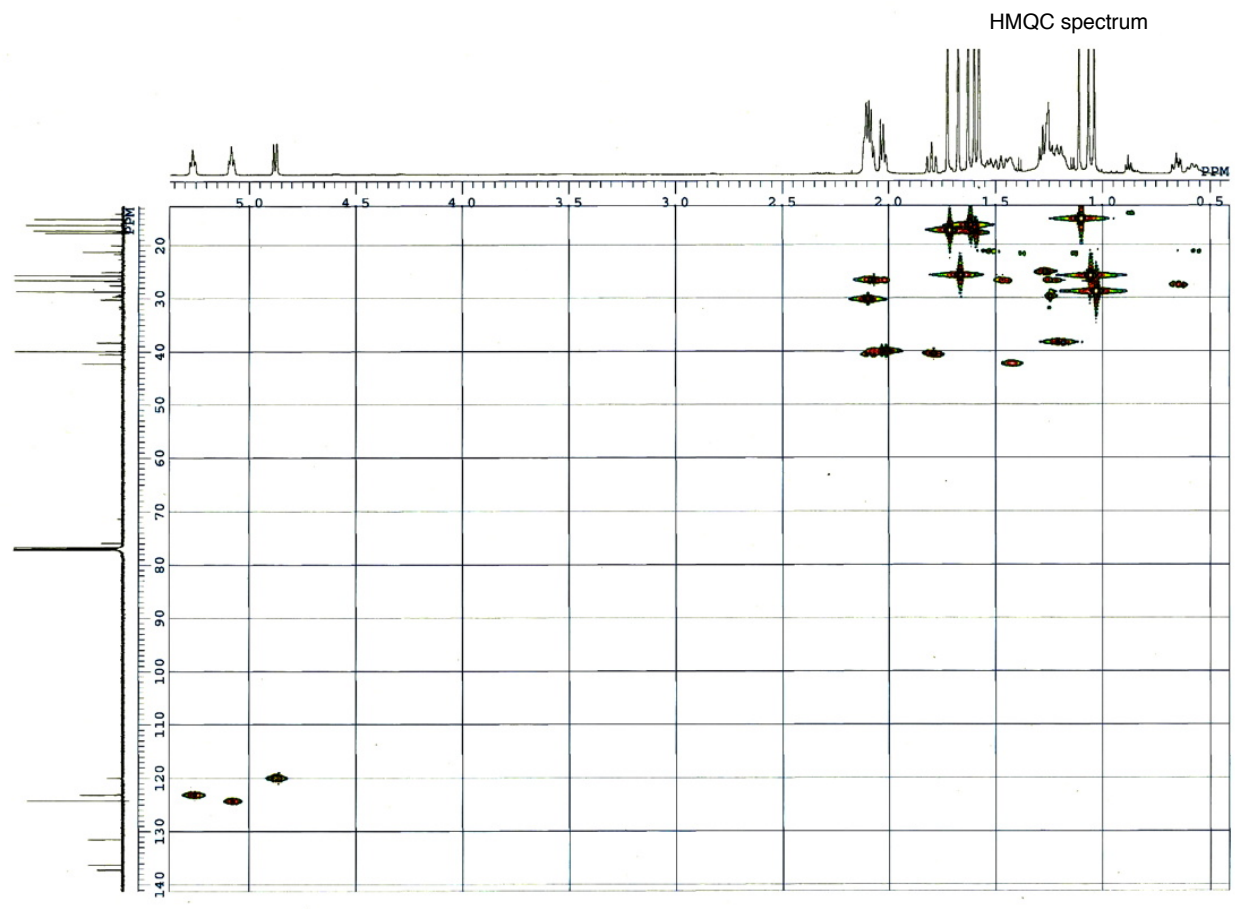



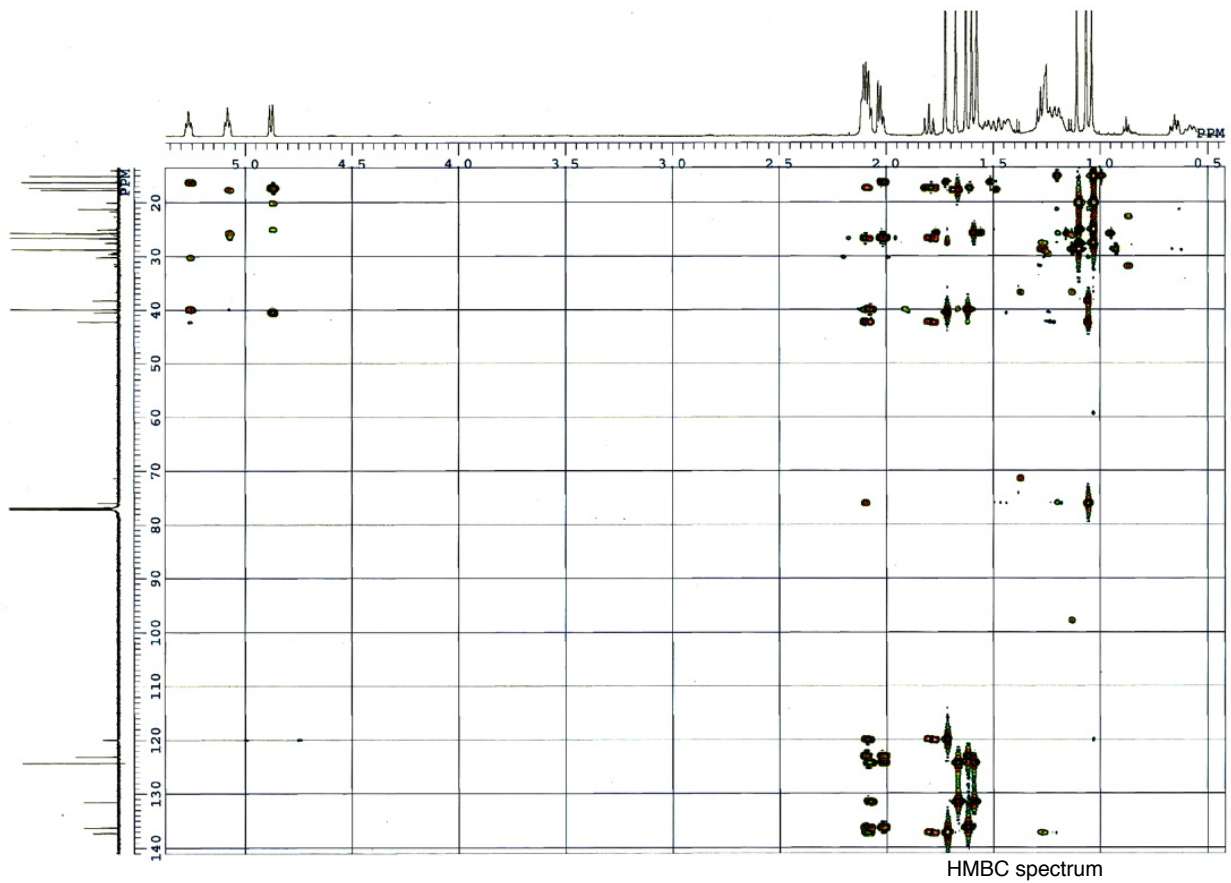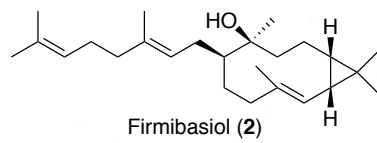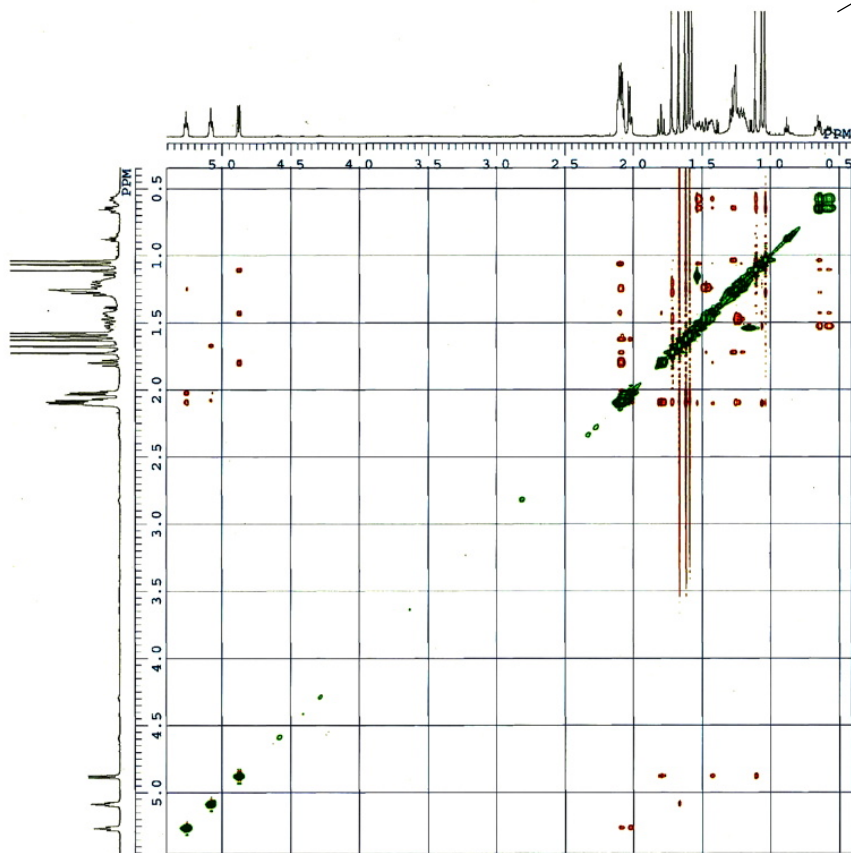

Supplement: molecules-25-02895-s001.pdf [file molecules-25-02895-s001.pdf]
